# Supplementary material for: Targeted gadofullerene for sensitive magnetic resonance imaging and risk-stratification of breast cancer
Source: PubMed Central journal article supplement (PMC5612990; doi:10.1038/s41467-017-00741-y), 2017-09-25
Supplement: 41467_2017_741_MOESM1_ESM.pdf [file 41467_2017_741_MOESM1_ESM.pdf]

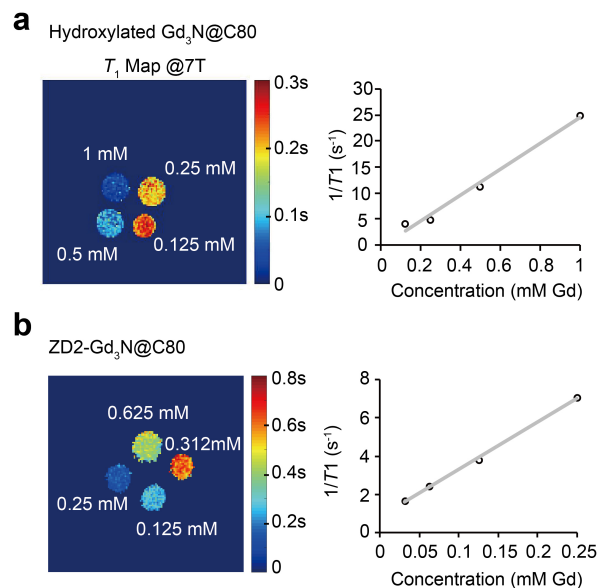

**Supplementary Figure 1** | Relaxivity measurement of hydroxylated Gd<sub>3</sub>N@C80 (**a**) and ZD2-Gd<sub>3</sub>N@C80 (**b**) at 7 Tesla. *T*<sub>1</sub> maps of NMR tubes containing gradient concentrations of contrast agents, and plots of 1/*T*<sub>1</sub> versus concentrations are shown. The *r*<sub>1</sub> relaxivities derived from the plots were *r*<sub>1</sub> = 24.68 mM<sup>-1</sup>s<sup>-1</sup> per Gd for hydroxylated Gd<sub>3</sub>N@C80 and *r*<sub>1</sub> = 24.78 mM<sup>-1</sup>s<sup>-1</sup> per Gd(III) for ZD2-Gd<sub>3</sub>N@C80.

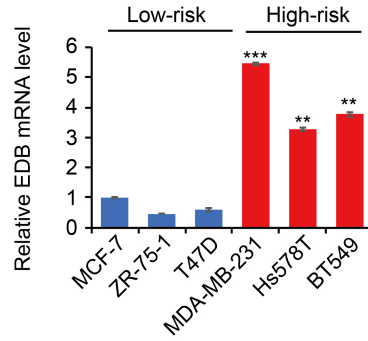

**Supplementary Figure 2** | RT-PCR analysis of EDB-RNA levels in breast cancer cells. MDA-MB-231, Hs578t and BT549 cells are high-risk TNBCs. MCF-7, ZR-75-1 and T47D are ER-positive breast cancer cells. Data are represented as ratios to the EDB mRNA level of MCF-7. The mRNA level of  $\beta$ -actin was used for normalization. \*\*:  $P < 0.01$  and \*\*\*:  $P < 0.001$  compared to low-risk breast cancer cell lines (two-tailed  $t$ -test; Data are presented as mean  $\pm$  s.e.m. n=3-4).

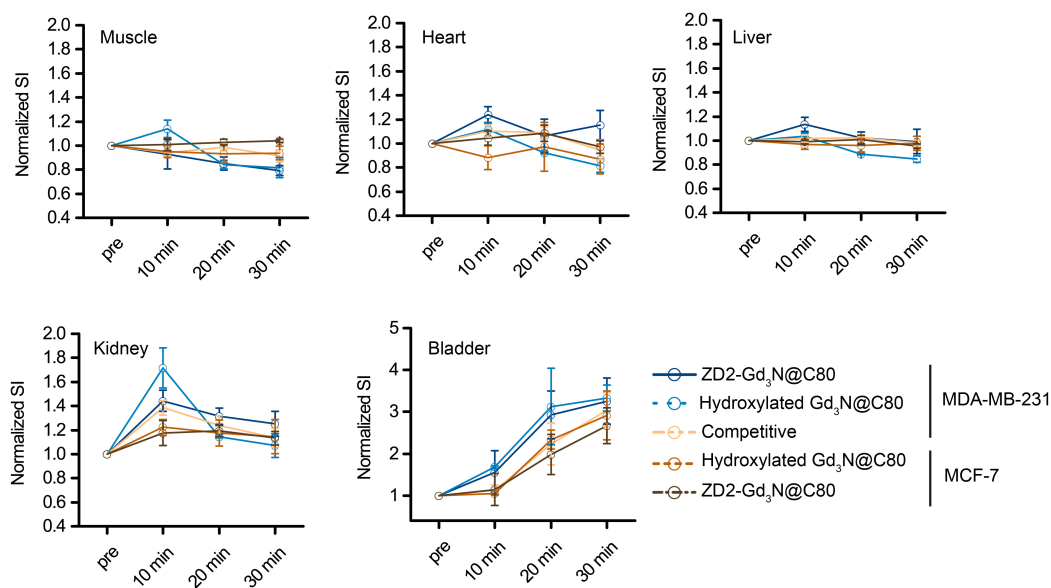

**Supplementary Figure 3** | Dynamic change of normalized signal intensities in muscle, heart, liver, kidney, and bladder in MDA-MB-231 and MCF-7 tumor models after injection of 5  $\mu\text{mol}$  Gd/kg ZD2-Gd<sub>3</sub>N@C80, Gd<sub>3</sub>N@C80, or the mixture of 25  $\mu\text{mol}$ /kg free ZD2 and 5  $\mu\text{mol}$  Gd/kg Gd<sub>3</sub>N@C80 (competitive) (Data are presented as mean $\pm$ s.e.m. n=3).

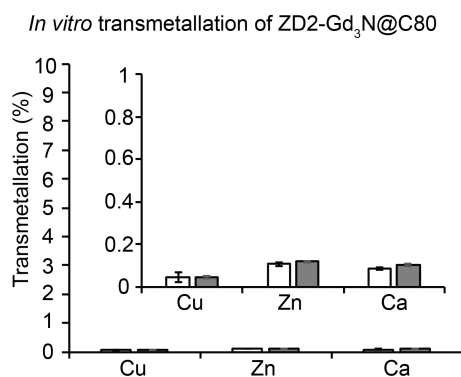

**Supplementary Figure 4** | *In vitro* transmetallation assay of ZD2-Gd<sub>3</sub>N@C80 after incubation in human serum for two hours. Data are presented as mean $\pm$ s.e.m.

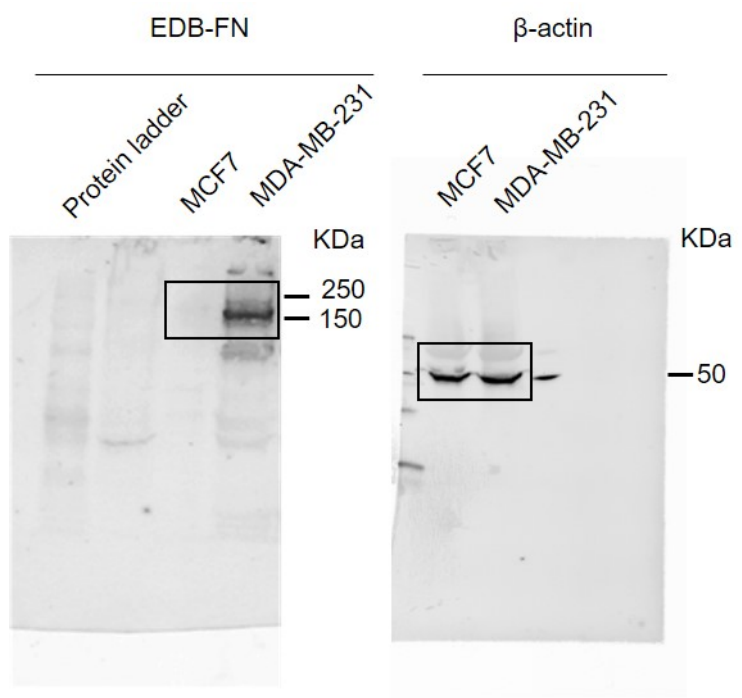

**Supplementary Figure 5.** Western blot with full gel and protein ladder showing EDB-FN and  $\beta$ -actin expression in MCF-7 and MDA-MB-231 tumours of Fig 3b.
